# Supplementary material
Source: PubMed Central journal article supplement (PMC2890424)
Supplement: 0913897107_pnas.200913897SI.pdf [file 0913897107_pnas.200913897SI.pdf]

# Supporting Information

Otsuki et al. 10.1073/pnas.0913897107

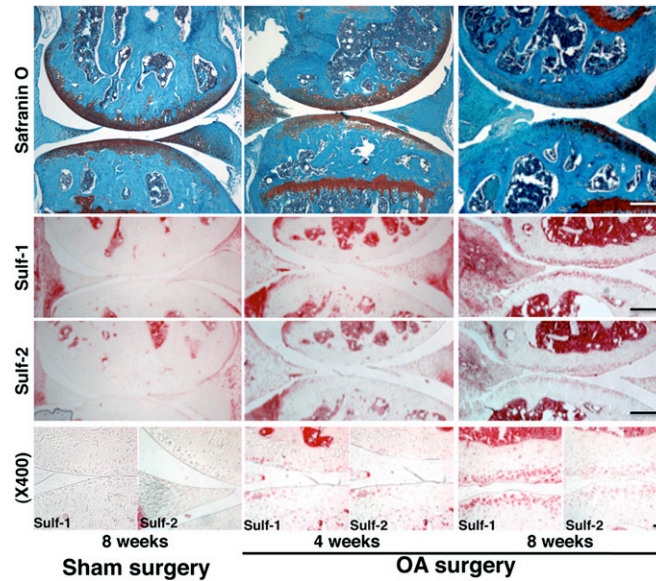

**Fig. S1.** Sulf overexpression in mouse knee joints with experimental OA. Wild-type (C57BL/6J) mice at the age of 8 weeks were subjected to surgically induced OA by resecting the medial meniscotibial ligament (MMTL) and the medial collateral ligament (MCL). Knee joints were harvested 4 and 8 weeks after surgery ( $n = 8$ ). Control mice were subjected to sham surgery with opening of the joint capsule but no ligament resection. Both Sulf-1 and Sulf-2 were overexpressed 4 weeks and more strongly 8 weeks after OA surgery in the articular cartilage, menisci, and synovium. (Scale bars: low magnification, 200  $\mu\text{m}$ ; high magnification, 50  $\mu\text{m}$ .)

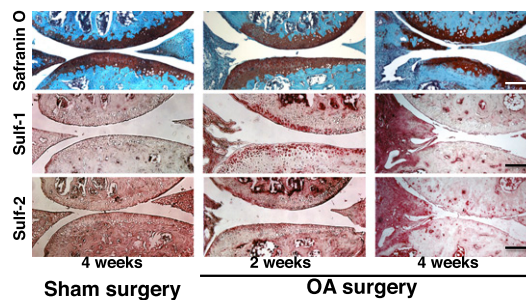

**Fig. S2.** Sulf expression in 6-month-old mouse knee joints with experimental OA. Wild-type (C57BL/6J) mice at the age of 6 months were subjected to surgically induced OA by resecting the MMTL and the MCL and knee joints were harvested 2 and 4 weeks after surgery ( $n = 4-8$ ). Control mice were subjected to sham surgery with opening of the joint capsule but no ligament resection. Both Sulf-1 and Sulf-2 were overexpressed in articular cartilage at 2 weeks but not at 4 weeks after OA surgery. (Scale bars: 200  $\mu\text{m}$ .)
